# Supplementary material for: The Association of Minimally Invasive Surgical Approaches and Mortality in Patients with Malignant Pleuropericarditis—A 10 Year Retrospective Observational Study
Source: MDPI journal article supplement (doi:10.3390/medicina58060718), 2022-05-27
Supplement: s1 [file s1]

## Supplementary materials

**Table S1.** Distribution of all variables in the sample

| Variables                                                      | All sample<br>(N = 338) |
|----------------------------------------------------------------|-------------------------|
| <i>Patients' characteristics and diagnosis types</i>           |                         |
| Event                                                          |                         |
| Alive/Censored                                                 | 28 (8.28%)              |
| Death                                                          | 310 (91.72%)            |
| Sex                                                            |                         |
| Males                                                          | 164 (48.52%)            |
| Females                                                        | 174 (51.48%)            |
| Age (y)                                                        | 60.92 (13.58), 19-94    |
| Imaging diagnosis                                              |                         |
| Echocardiography                                               | 39 (11.54%)             |
| Computed tomography                                            | 299 (88.46%)            |
| Clinical Diagnosis                                             |                         |
| Pericarditis and right pleural effusion                        | 141 (41.72%)            |
| Pericarditis and left pleural effusion                         | 162 (47.93%)            |
| Pericarditis and bilateral pleural effusion                    | 35 (10.36%)             |
| Surgery type                                                   |                         |
| Thoracoscopic pleuropericardial window                         | 288 (85.21%)            |
| Subxiphoid pleuropericardial window through<br>mediastinoscopy | 50 (14.79%)             |
| Comorbidities                                                  |                         |
| No comorbidity                                                 | 71 (21.13%)             |
| Hypertension                                                   | 137 (40.77%)            |
| Diabetes                                                       | 26 (7.74%)              |
| Atrial fibrillation                                            | 15 (4.46%)              |
| Renal insufficiency                                            | 17 (5.06%)              |
| Heart failure                                                  | 54 (16.07%)             |
| Hepatic insufficiency                                          | 8 (2.38%)               |
| Chronic obstructive bronchopneumopathy                         | 8 (2.38%)               |
| Presence of pericardial tamponade                              |                         |
| Yes                                                            | 35 (11.83%)             |
| No                                                             | 298 (88.17%)            |
| Presence of hypodiastolia                                      |                         |
| Yes                                                            |                         |
| No                                                             |                         |
| <i>The patients' cancer types</i>                              |                         |
| Malignancies                                                   |                         |
| Lung Cancer                                                    | 181 (53.55%)            |
| Esophageal/Gastric Cancer                                      | 6 (1.78%)               |
| Leukemia/Lymphoma                                              | 43 (12.72%)             |
| Brest Cancer                                                   | 55 (16.27%)             |
| Pleural Mesothelioma                                           | 21 (6.21%)              |
| Ovarian Cancer                                                 | 11 (3.25%)              |
| Cervical Cancer                                                | 11 (3.25%)              |
| Other types of cancers (Sarcoma, Renal, and Colorectal Cancer) | 10 (2.96%)              |

| Variables                                        | All sample<br>(N = 338) |
|--------------------------------------------------|-------------------------|
| Metastases                                       |                         |
| No other metastases                              | 308 (91.12%)            |
| Heart                                            | 2 (0.59%)               |
| Liver                                            | 6 (1.78%)               |
| Peritoneum                                       | 5 (1.48%)               |
| Bone                                             | 13 (3.85%)              |
| Upper kidney                                     | 3 (0.89%)               |
| Kidney                                           | 1 (0.30%)               |
| <i>Pleurodesis treatment and recurrence rate</i> |                         |
| Pleurodesis treatment                            |                         |
| Talc                                             | 49 (14.50%)             |
| Betadine                                         | 289 (85.50%)            |
| Recurrence of pleuropericarditis                 |                         |
| Recurrence                                       | 10 (2.96%)              |
| No recurrence                                    | 328 (94.04%)            |

Abbreviations: N, number; SD, standard deviation; y. years; N = 338.
